## Ketone bodies in Right Ventricular Failure: A Unique Therapeutic Opportunity

Madelyn Blake<sup>1</sup>, Patrycja Puchalska, PhD<sup>2</sup>, Felipe Kazmirczak, MD<sup>1</sup>, Thenappan Thenappan, MD<sup>1</sup>, Peter A. Crawford, MD, PhD<sup>2,3</sup>, and Kurt W. Prins, MD, PhD<sup>1</sup>

### Affiliations

1. Lillehei Heart Institute, Cardiovascular Division, University of Minnesota
2. Division of Molecular Medicine, Department of Medicine, University of Minnesota
3. Department of Biochemistry, Molecular Biology, and Biophysics

**Funding:** PAC is funded by NIH R01s DK091538 and AG069781, KWP is funded by NIH K08 HL140100, NIH R01s HL158795 and HL162927, and an Innovation Grant from the American Lung Association (IA-816386)

### Author for Correspondence

Kurt Prins, MD, PhD

Associate Professor of Medicine

Director of Translational Research in Pulmonary Hypertension

University of Minnesota

Minneapolis, MN

Prin0088@umn.edu

## Abstract

Ketone bodies are pleiotropic metabolites that play important roles in multiple biological processes ranging from bioenergetics, to inflammation regulation via suppression of the NLRP3 inflammasome, and epigenetic modifications. Ketone bodies are elevated in left ventricular failure (LVF) and approaches that increase ketone concentrations exert beneficial effects in rodents and humans. However, the regulation of ketones in right ventricular failure (RVF) are unexplored. Here, we show in human pulmonary arterial hypertension (PAH), a compensatory ketosis is absent in patients with RVF. In the monocrotaline rat model of PAH-mediated RVF, a dietary-induced ketosis improves RV function, suppresses NLRP3 inflammasome activation, and combats RV fibrosis. These data suggest ketogenic therapies may particularly effective in RVF, and future studies evaluating the effects of ketones in RVF are warranted.

**To the Editor,**

Right ventricular failure(RVF) is the leading cause of death in pulmonary arterial hypertension (PAH), but there are no therapies that effectively combat RVF(1). This is in juxtaposition to left ventricular failure(LVF) treatment as several medications can improve LV function and survival(2). Differences in ventricular development, morphology, load, and adaptability may partially explain why LVF therapies are largely ineffective for RVF(3). Additionally, there are differing degrees of end-organ dysfunction when comparing RVF and LVF. In particular, RVF impairs liver function to a greater extent, and it can even result in cirrhosis(4). This raises the possibility that a RV-liver axis exists, and it could be targeted to combat RVF.

Ketone bodies, metabolites that are primarily synthesized by the liver, regulate diverse biological functions ranging from energy homeostasis, inflammation, and epigenetic regulation(5). In LVF preclinical models and patients with LVF, ketone levels are elevated and correlate with HF severity(6). This response is widely believed to be compensatory as ketogenic interventions improve cardiac function in rodent LVF and ketone infusion acutely increases cardiac output in LVF patients(6). Additionally, the ketone body  $\beta$ -hydroxybutyrate ( $\beta$ OHB) suppresses nucleotide-binding domain, leucine-rich-containing family, pyrin domain-containing-3 (NLRP3) inflammasome activity(7), a pathway recently implicated in PAH-mediated RVF(8). While there is abundant data evaluating ketones in LVF, the relationships among ketone body concentrations, RV inflammasome activation, and RV function in preclinical and human RVF are unexplored.

Here, we examined the relationship between RV function and serum ketone bodies in 51 PAH-patients from the University of Minnesota Pulmonary Hypertension Program. PAH patients were classified into two groups: a compensated (cardiac index  $>2.2$  L/min/m<sup>2</sup> as defined by Thermodilution) or a decompensated (cardiac index  $\leq 2.2$  L/min/m<sup>2</sup>) RV phenotype (Table 1). RV function was further characterized using both hemodynamic and echocardiographic parameters. In rodent studies, male Sprague Dawley rats (Charles River Laboratories) were randomized into three experimental groups: phosphate buffered saline injected (control), monocrotaline (MCT, 60 mg/kg subcutaneous injection) rats fed standard (MCT-Standard) chow (Teklad:2918), and monocrotaline rats fed ketogenic (MCT-Keto) chow (Teklad:93M). Dietary intervention began two weeks

after MCT injection. End point analyses were performed 24 days post MCT exposure. Rodent RV function was examined with echocardiography. Picrosirius red staining of RV free wall sections quantified fibrosis. Immunoblots of RV extracts were probed with antibodies to NLRP3, Caspase-1, interleukin-1 $\beta$ , and apoptosis-associated speck-like protein containing a CARD (ASC) to biochemically characterize inflammasome activation. RV sections were stained with antibodies to galectin-3 and ASC to identify total macrophage and ASC-positive macrophage. Confocal micrographs were collected on a Zeiss LSM 900 Airyscan 2.0 microscope. RV fibrosis and macrophage analyses were blindly performed by MB. Serum ketones were measured using UPLC-MS/MS as described(9). All data were evaluated for normality using Shapiro-Wilk test. When analyzing differences between two groups, normally distributed variables were compared using unpaired *t*-test and Mann-Whitney U-test was used for non-normally distributed variables. When comparing three groups with normal distributions, one-way ANOVA with Tukey post hoc analysis was performed if variance was equal as determined by Brown-Forsythe test. If variance was unequal, Brown-Forsythe and Welch ANOVA with Dunn post hoc analysis was completed. If the data were not normally distributed, the Kruskal-Wallis and Dunn's multiple-comparisons tests were employed. All statistical analyses were performed on GraphPad Prism. Rodent and human studies were approved by the University of Minnesota Institutional Animal Care and Use Committee and Institutional Review Board respectively.

We first validated divergent RV phenotypes from our PAH patient cohort. Both hemodynamic and echocardiographic analyses demonstrated more severe RV dysfunction in the decompensated group (**Figure 1A**). Surprisingly, unlike prior observations in patients with LVF, circulating concentrations of the two ketone bodies acetoacetate (AcAc) and  $\beta$ OHB were not different when the two groups were compared (**Figure 1B**). Moreover, AcAc and  $\beta$ OHB levels were not associated with cardiac index, right atrial pressure, RV global longitudinal strain, or tricuspid annular plane systolic excursion (TAPSE) (**Figure 1 C and D**). Thus, a compensatory ketosis was lacking in humans with PAH-mediated RVF.

Next, we determined how a dietary-induced ketosis modulated RVF in MCT rats (**Figure 2A**). In agreement with our human data, MCT-Standard rats were not ketotic (**Figure 2B**). However, the ketogenic diet increased serum concentrations of both AcAc and  $\beta$ OHB (**Figure 2B**). One of the MCT-Keto rats died, but compared to MCT-Standard rats, the remaining MCT-Keto rats showed higher TAPSE, percent RV free wall

thickening, and cardiac output despite no differences in pulmonary artery acceleration time (**Figure 2C**). Thus, a diet-induced ketosis was associated with augmented RV function in preclinical RVF.

Finally, we probed the effects of the ketogenic diet intervention on RV macrophage NLRP3 activation. Immunoblots showed the MCT-Keto animals had decreased RV levels of NLRP3, pro-caspase-1, pro and mature interleukin-1 $\beta$ , and ASC relative to the MCT-Standard group, but not all changes were statistically significant (**Figure 2D**). In concordance with our Western blots, both total macrophage and ASC+ macrophage abundances were normalized by the ketogenic diet (**Figure 2E**). Finally, RV fibrosis was blunted in MCT-Keto animals (**Figure 2F**).

In summary, circulating ketone body concentrations are not elevated in both rodent and human PAH-mediated RVF. However, in rodents, a ketogenic diet augments RV function and suppresses pathological macrophage NLRP3 inflammasome activation and RV fibrosis. The absence of ketosis in PAH-induced RVF agrees with other data showing this biochemical response is dysregulated by RVF. In particular, circulating  $\beta$ OHB concentrations in patients with arrhythmogenic right ventricular cardiomyopathy with isolated RV-involvement are not as high as those with biventricular involvement(10). Certainly, Future studies are required to gain a deeper understanding of our proposed RV-liver axis, and in particular, a detailed analysis of systemic ketone metabolism in RVF will be crucial. Interestingly, a clinical trial evaluating a ketogenic diet intervention in patients with pulmonary hypertension due to heart failure with preserved ejection fraction is ongoing (NCT04942548). Hopefully, this trial will shed more light on the RV-ketone relationship and determine if elevating ketones modulates RV function. In conclusion, the summation of our preclinical and clinical data suggests approaches to augment ketosis could combat RVF, and it is possible that patients with RVF are uniquely primed for ketogenic interventions.

## References

1. Houston BA, Brittain EL, Tedford RJ. Right Ventricular Failure. *N Engl J Med* 2023; 388: 1111-1125.
2. Heidenreich PA, Bozkurt B, Aguilar D, Allen LA, Byun JJ, Colvin MM, Deswal A, Drazner MH, Dunlay SM, Evers LR, Fang JC, Fedson SE, Fonarow GC, Hayek SS, Hernandez AF, Khazanie P, Kittleson MM, Lee CS, Link MS, Milano CA, Nwacheta LC, Sandhu AT, Stevenson LW, Vardeny O, Vest AR, Yancy CW. 2022 AHA/ACC/HFSA Guideline for the Management of Heart Failure: Executive Summary: A Report of the American College of Cardiology/American Heart Association Joint Committee on Clinical Practice Guidelines. *Circulation* 2022; 145: e876-e894.
3. Prisco SZ, Thenappan T, Prins KW. Treatment Targets for Right Ventricular Dysfunction in Pulmonary Arterial Hypertension. *JACC Basic Transl Sci* 2020; 5: 1244-1260.
4. Rosenkranz S, Howard LS, Gombert-Maitland M, Hoepfer MM. Systemic Consequences of Pulmonary Hypertension and Right-Sided Heart Failure. *Circulation* 2020; 141: 678-693.
5. Puchalska P, Crawford PA. Multi-dimensional Roles of Ketone Bodies in Fuel Metabolism, Signaling, and Therapeutics. *Cell Metab* 2017; 25: 262-284.
6. Matsuura TR, Puchalska P, Crawford PA, Kelly DP. Ketones and the Heart: Metabolic Principles and Therapeutic Implications. *Circ Res* 2023; 132: 882-898.
7. Youm YH, Nguyen KY, Grant RW, Goldberg EL, Bodogai M, Kim D, D'Agostino D, Planavsky N, Lupfer C, Kanneganti TD, Kang S, Horvath TL, Fahmy TM, Crawford PA, Biragyn A, Alnemri E, Dixit VD. The ketone metabolite  $\beta$ -hydroxybutyrate blocks NLRP3 inflammasome-mediated inflammatory disease. *Nat Med* 2015; 21: 263-269.
8. Al-Qazazi R, Lima PDA, Prisco SZ, Potus F, Dasgupta A, Chen KH, Tian L, Bentley RET, Mewburn J, Martin AY, Wu D, Jones O, Maurice DH, Bonnet S, Provencher S, Prins KW, Archer SL. Macrophage-NLRP3 Activation Promotes Right Ventricle Failure in Pulmonary Arterial Hypertension. *Am J Respir Crit Care Med* 2022; 206: 608-624.
9. Puchalska P, Nelson AB, Stagg DB, Crawford PA. Determination of ketone bodies in biological samples via rapid UPLC-MS/MS. *Talanta* 2021; 225: 122048.
10. Song JP, Chen L, Chen X, Ren J, Zhang NN, Tirasawasdichai T, Hu ZL, Hua W, Hu YR, Tang HR, Chen HV, Hu SS. Elevated plasma  $\beta$ -hydroxybutyrate predicts adverse outcomes and disease progression in patients with arrhythmogenic cardiomyopathy. *Sci Transl Med* 2020; 12.

**Figure 1: Circulating ketone body concentrations were not elevated in PAH-mediated RV failure.** (A) Both hemodynamic and echocardiography revealed a greater degree of RV dysfunction in the decompensated group. (B) Ketone body concentrations were not elevated in the decompensated group. (C) Hemodynamic measures of RV function were not associated with serum ketone body concentrations. (D) Echocardiographic measures of RV function were not strongly associated with AcAc or  $\beta$ OHB. Red dots signify decompensated patients ( $n=25$ ) and blue dots signify compensated patients ( $n=26$ ).

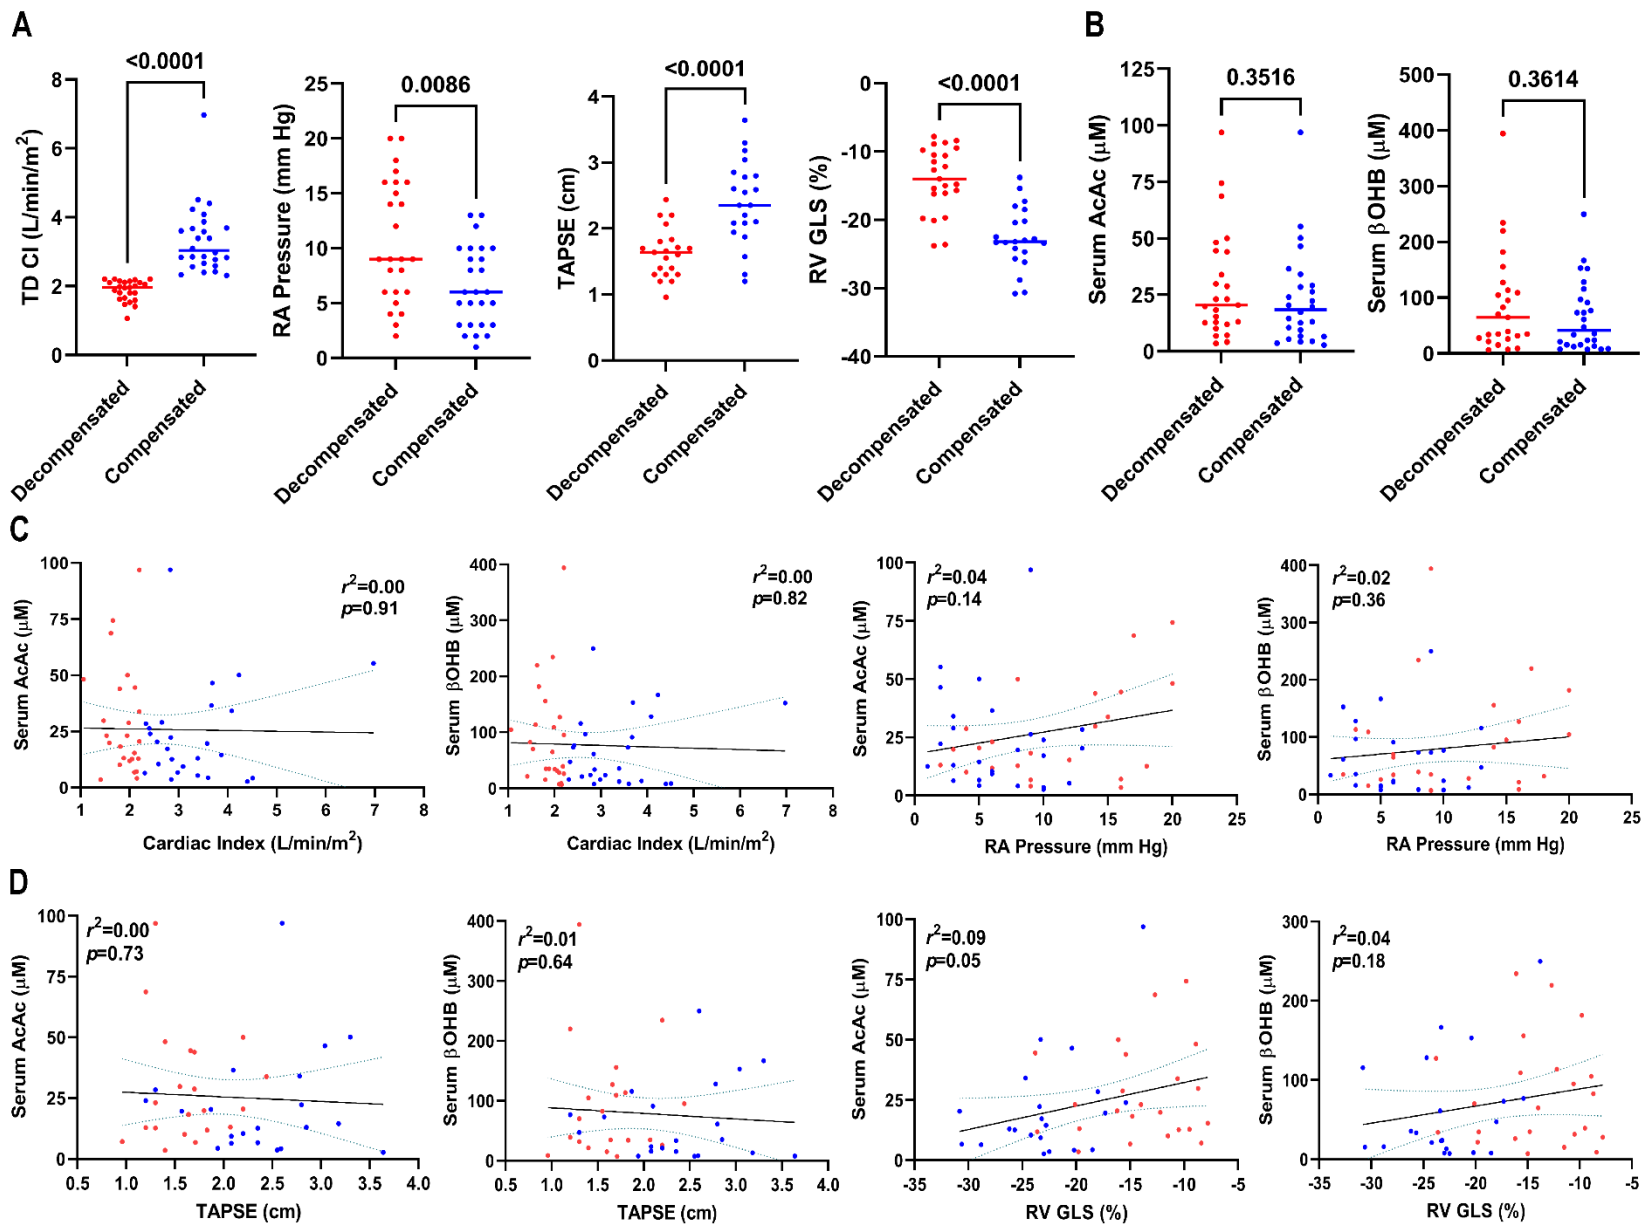



**Figure 2: A ketogenic diet increased serum ketone body concentrations, augmented RV function, and suppressed macrophage NLRP3 activation in monocrotaline rats.** (A) Diagram of experiment approach and caloric composition of diets. (B) A ketogenic diet increased serum concentrations of AcAc and  $\beta$ OHB in MCT-Keto rats. (C) Ketogenic diet improved RV function in MCT rats. (D) Representative Western blots and subsequent quantification of protein abundance from  $n=4$  control,  $n=5$  MCT-Standard, and  $n=5$  MCT-Keto RV extracts. Signals from the four control animals were averaged to serve as an arbitrary standard of 1. MCT-Standard and MCT-Keto were then compared to each other. (E) Representative confocal micrographs stained with wheat germ agglutinin (Blue), galectin-3 (Red), and ASC (Yellow) to show total macrophage (galectin-3 positive) and ASC+ macrophage in RV sections. Arrows highlight ASC+ macrophage in each section. Quantification of total and ASC+ macrophage in four randomly selected areas per RV section on a 20x objective from three distinct animals per experimental group. (F) Representative Picrosirius Red section with quantification of percent fibrosis on right. MCT-Keto rats had less RV fibrosis than MCT-Standard.

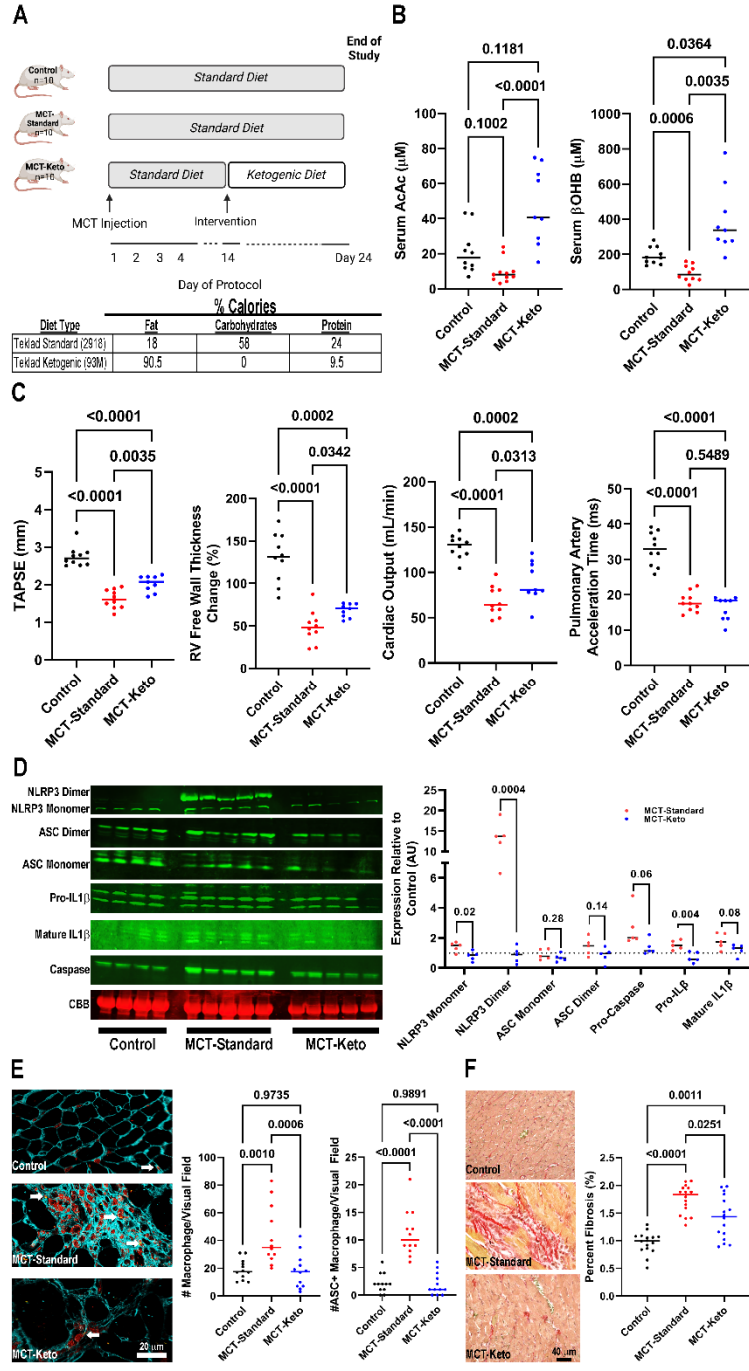

**Table 1 Clinical, Echocardiographic, and Hemodynamic Characteristics of Study Cohort**

| Characteristics                         | Total Cohort<br>( <i>n</i> = 51) | Preserved RV Function<br>( <i>n</i> = 26) | Depressed RV Function<br>( <i>n</i> = 25) | <i>p</i> -value |
|-----------------------------------------|----------------------------------|-------------------------------------------|-------------------------------------------|-----------------|
| Age, years                              | 58.0 ± 15                        | 59.0 ± 12                                 | 57.0 ± 17                                 | 0.56            |
| Female, <i>n</i> (%)                    | 31 (60)                          | 17 (65)                                   | 14 (56)                                   | 0.62            |
| Body mass index, kg/m <sup>2</sup>      | 28 ± 7                           | 28 ± 7                                    | 28 ± 6                                    | 0.61            |
| WHO Functional Class ( <i>n</i> = 48)   |                                  |                                           |                                           |                 |
| II                                      | 13 (25)                          | 8 (31)                                    | 5 (20)                                    |                 |
| III                                     | 32 (63)                          | 13 (50)                                   | 19 (73)                                   |                 |
| IV                                      | 1 (0)                            | 0 (0)                                     | 1 (0)                                     |                 |
| Comorbidities, <i>n</i> (%)             |                                  |                                           |                                           |                 |
| Hypertension                            | 23 (45)                          | 12 (46)                                   | 11 (44)                                   | 0.76            |
| Diabetes                                | 12 (24)                          | 6 (23)                                    | 6 (24)                                    | 0.85            |
| Hyperlipidemia                          | 16 (31)                          | 9 (35)                                    | 7 (28)                                    | 0.69            |
| Coronary artery disease                 | 7 (14)                           | 3 (12)                                    | 4 (16)                                    | 0.92            |
| Atrial fibrillation                     | 5 (10)                           | 1 (4)                                     | 4 (16)                                    | 0.14            |
| COPD                                    | 8 (16)                           | 5 (19)                                    | 3 (12)                                    | 0.28            |
| Medications, <i>n</i> (%)               |                                  |                                           |                                           |                 |
| Dual oral therapy                       | 15 (29)                          | 12 (46)                                   | 3 (12)                                    | < 0.01          |
| Triple oral therapy                     | 11 (22)                          | 4 (15)                                    | 7 (28)                                    | 0.63            |
| Parental Prostacyclin plus oral         | 15 (29)                          | 5 (19)                                    | 10 (40)                                   | 0.09            |
| Lab                                     |                                  |                                           |                                           |                 |
| Serum hemoglobin, g/dl ( <i>n</i> =51)  | 13 ± 2                           | 13 ± 2                                    | 14 ± 2                                    | 0.34            |
| Serum creatinine, mg/dl ( <i>n</i> =51) | 1 ± 0.40                         | 1 ± 0.27                                  | 1 ± 0.43                                  | 0.36            |
| Serum NT-proBNP ( <i>n</i> =50)         | 1786 ± 2705                      | 508 ± 1067                                | 2988 ± 3220                               | < 0.001         |
| Serum Bilirubin                         | 0.67 ± 0.33                      | 0.56 ± 0.23                               | 0.76 ± 0.39                               | < 0.05          |
| Serum ALT                               | 26 ± 10                          | 28 ± 12                                   | 24 ± 8                                    | 0.30            |
| Serum AST                               | 21 ± 9                           | 20 ± 8                                    | 23 ± 9                                    | 0.21            |
| Echocardiography                        |                                  |                                           |                                           |                 |
| Right ventricular FAC ( <i>n</i> =44)   | 15 ± 15                          | 2 ± 9                                     | 26 ± 8                                    | < 0.001         |
| RVEDA                                   | 26 ± 8                           | 24 ± 7                                    | 29 ± 9                                    | < 0.05          |
| RVESA                                   | 18 ± 8                           | 15 ± 6                                    | 22 ± 9                                    | < 0.01          |
| TAPSE                                   | 2 ± 0.63                         | 2 ± 0.64                                  | 2 ± 0.38                                  | < 0.001         |

|                                                          |         |         |         |         |
|----------------------------------------------------------|---------|---------|---------|---------|
| S'                                                       | 11 ± 4  | 13 ± 4  | 9 ± 3   | < 0.01  |
| Tricuspid regurgitation severity                         | 3 ± 1   | 2 ± 1   | 3 ± 1   | < 0.05  |
| Hemodynamics                                             |         |         |         |         |
| Heart rate, beats/min ( <i>n</i> =51)                    | 74 ± 19 | 71 ± 12 | 77 ± 24 | 0.25    |
| Mean right atrial, mm Hg ( <i>n</i> =51)                 | 7 ± 5   | 7 ± 4   | 11 ± 6  | < 0.005 |
| Mean PAP, mm Hg ( <i>n</i> =51)                          | 43 ± 12 | 36 ± 8  | 49 ± 14 | < 0.001 |
| Cardiac output, liters/min ( <i>n</i> =51)               | 5 ± 2   | 6 ± 2   | 4 ± 1   | < 0.001 |
| Cardiac index, liters/min/m <sup>2</sup> ( <i>n</i> =51) | 3 ± 1   | 3 ± 1   | 2 ± 0.3 | < 0.001 |
| PVR, Wood units ( <i>n</i> =50)                          | 8 ± 5   | 5 ± 2   | 11 ± 6  | < 0.001 |
